# Supplementary material
Source: PubMed Central journal article supplement (PMC2732316)
Supplement: btp275_1.pdf [file btp275_1.pdf]

## Supplemental Information

This document contains the pseudo-code showing the algorithms described in this manuscript. Figure 1 shows the routines required for top down search in a suffix array. Algorithm 1 shows the main part of the algorithm for finding MEMs in a sparse suffix array. The algorithm must be started at offset prefixes  $p_0$  in the query string  $P$ . In other words,  $\text{MEM}(p_0)$  must be run for each value of  $p_0 = 0 \dots K - 1$ . The parallel version runs each call  $p_0 = 0 \dots K - 1$  in a separate thread. The MEMs algorithm relies on calls to **traverse** (see Algorithm 2) in order to match up to  $\mathbf{L} - (K - 1)$  characters and to find the maximum length match. If a match of length  $\geq \mathbf{L} - (K - 1)$  characters can be obtained, the suffix array interval  $d : [s..e]$  corresponding to matches of length  $\geq \mathbf{L} - (K - 1)$  and the interval  $q : [l..r]$  corresponding to the maximum length match is used by **collectMEMs** in Algorithm 3 below to find right maximal matches. Each right maximal match must be verified for left maximality by scanning up to  $K$  characters to the left of the match (see **findL** Algorithm 4 below). Suffix links are simulated using **suffixlink** and **expandlink** in Figure 2.

|                                                                                                                                                                                                                                                                                                                                                                                                                                                                                                                                                                               |                                                                                                                                                                                                                                                                                                                                                                                                                                                                                                                                                                                                                                                                                                           |
|-------------------------------------------------------------------------------------------------------------------------------------------------------------------------------------------------------------------------------------------------------------------------------------------------------------------------------------------------------------------------------------------------------------------------------------------------------------------------------------------------------------------------------------------------------------------------------|-----------------------------------------------------------------------------------------------------------------------------------------------------------------------------------------------------------------------------------------------------------------------------------------------------------------------------------------------------------------------------------------------------------------------------------------------------------------------------------------------------------------------------------------------------------------------------------------------------------------------------------------------------------------------------------------------------------|
| <pre> <b>bsearchL</b>(<math>c, p : [l..r]</math>) if <math>c = S[SA[l] + p]</math> return <math>l</math> while <math>r - l &gt; 1</math>   <math>m = (l + r) / 2</math>   if <math>c &lt; S[SA[m] + p]</math> then <math>r = m</math>   else <math>l = m</math> return <math>r</math>  <b>bsearchR</b>(<math>c, p : [l..r]</math>) if <math>c = S[SA[r] + p]</math> return <math>r</math> while <math>r - l &gt; 1</math>   <math>m = (l + r) / 2</math>   if <math>c &lt; S[SA[m] + p]</math> then <math>r = m</math>   else <math>l = m</math> return <math>l</math> </pre> | <pre> <b>topdown</b>(<math>c, p : [s..e]</math>) if <math>c &lt; S[SA[s] + p]</math> return <math>\perp : [0..0]</math> if <math>c &gt; S[SA[e] + p]</math> return <math>\perp : [0..0]</math> <math>l = \text{bsearchL}(c, p : [s..e])</math> <math>r = \text{bsearchR}(c, p : [s..e])</math> if <math>l \leq r</math> return <math>(p + 1) : [l..r]</math> else return <math>\perp : [0..0]</math>  <b>search</b>(<math>P</math>) <math>p = 0, s = 0, e = n - 1</math> while <math>p &lt;  P </math>   <math>p' : [s'..e'] = \text{topdown}(P[p], p : [s..e])</math>   if <math>p' = \perp</math> return <math>\perp</math>   <math>p : [s..e] = p' : [s'..e']</math> return <math>[s..e]</math> </pre> |
|-------------------------------------------------------------------------------------------------------------------------------------------------------------------------------------------------------------------------------------------------------------------------------------------------------------------------------------------------------------------------------------------------------------------------------------------------------------------------------------------------------------------------------------------------------------------------------|-----------------------------------------------------------------------------------------------------------------------------------------------------------------------------------------------------------------------------------------------------------------------------------------------------------------------------------------------------------------------------------------------------------------------------------------------------------------------------------------------------------------------------------------------------------------------------------------------------------------------------------------------------------------------------------------------------------|

Figure 1: Elements of top down traversal in suffix array by  $O(\log n)$  binary search. **bsearchL** and **bsearchR** use binary search to locate the left and right ends of matched interval respectively. **topdown** uses each binary search to match one character  $c$  at a time. **search** shows how **topdown** can be used to locate an exact match of a query string  $P$  in the suffix array indexed reference string  $S$ .

---

**Algorithm 1** MEM( $p_0$ )

---

$d : [s..e] = q : [l..r] = 0 : [0..n/K - 1]$ ,  $p = p_0$   
while  $p < |P| - (K - p_0)$   
   $d : [s..e] = \mathbf{traverse}(p, d : [s..e], \mathbf{L} - (K - 1))$   
   $q : [l..r] = \mathbf{traverse}(p, q : [l..r], |P|)$   
  if  $d \leq 1$  then  
     $d : [s..e] = q : [l..r] = 0 : [0..n/K - 1]$   
     $p = p + K$ , continue  
  if  $d \geq \mathbf{L} - (K - 1)$  then **collectMEMs**( $p, d : [s..e], q : [l..r]$ )  
   $p = p + K$   
   $d : [s..e] = \mathbf{suffixlink}(d : [s..e])$   
   $q : [l..r] = \mathbf{suffixlink}(q : [l..r])$   
  if  $d = \perp$  then  $d : [s..e] = q : [l..r] = 0 : [0..n/K - 1]$ , continue

---

---

**Algorithm 2**  $\mathbf{traverse}(p, d : [s..e], M)$ 

---

while  $p + d < |P|$   
   $d_2 : [s_2..e_2] = \mathbf{topdown}(P[p + d], d : [s..e])$   
  if  $d_2 = \perp$  return  $d : [s..e]$   
   $d : [s..e] = d_2 : [s_2..e_2]$   
  if  $d \geq M$  break  
return  $d : [s..e]$

---

---

**Algorithm 3**  $\mathbf{collectMEMs}(p, d : [s..e], q : [l..r])$ 

---

for  $i = l \dots r$  do **findL**( $p, SA[i], q$ )  
while  $q \geq d$   
  if  $r + 1 < n/K$  then  $q = \max(LCP[l], LCP[r + 1])$   
  else  $q = LCP[l]$   
  if  $q \geq d$  then  
    while  $LCP[l] \geq q$  do  
       $l = l - 1$ , **findL**( $p, SA[l], q$ )  
    while  $r + 1 < n/K$  and  $LCP[r + 1] \geq q$  do  
       $r = r + 1$ , **findL**( $p, SA[r], q$ )

---

---

**Algorithm 4**  $\mathbf{findL}(p, i, q)$ 

---

for  $k = 0 \dots K - 1$  do  
  if ( $p = 0$  or  $i = 0$ ) and  $q \geq \mathbf{L}$   
    MEM at  $i$  in  $S$ ,  $p$  in  $P$ , and length  $q$   
    return  
  if  $P[p - 1] \neq S[i - 1]$  and  $q \geq \mathbf{L}$   
    MEM at  $i$  in  $S$ ,  $p$  in  $P$ , and length  $q$   
    return  
   $p = p - 1$ ,  $i = i - 1$ ,  $q = q + 1$

---

```

suffixlink( $q : [l..r]$ )
 $q = q - K$ 
if  $q \leq 0$  return  $\perp : [0..0]$ 
 $l = ISA[SA[l]/K + 1]$ 
 $r = ISA[SA[r]/K + 1]$ 
 $q : [l..r] = \mathbf{expandlink}(q : [l..r])$ 
return  $q : [l..r]$ 

expandlink( $q : [l..r]$ )
if  $q = 0$  return  $0 : [0..n-1]$ 
 $T = 2q \log n, e = 0$ 
while  $l \geq 0$  and  $LCP[l] \geq q$ 
     $e = e + 1$ , if  $e \geq T$  return  $\perp : [0..0]$ 
     $l = l - 1$ 
while  $r \leq n - 1$  and  $LCP[r+1] \geq q$ 
     $e = e + 1$ , if  $e \geq T$  return  $\perp : [0..0]$ 
     $r = r + 1$ 
return  $q : [l..r]$ 

```

Figure 2: Suffix links are simulated using **suffixlink** and **expandlink**.
